# Supplementary material
Source: publisher figshare collection journal article supplement (https://karger.figshare.com/ndownloader/files/38892168)
Supplement: Supplementary file 1 [file 38892168]

|  |  | **Men** | | **Women** | |  |  | | **Men** | | **Women** | |  |
| --- | --- | --- | --- | --- | --- | --- | --- | --- | --- | --- | --- | --- | --- |
|  |  | **N** | **(%)** | **N** | **(%)** | **p-value** |  | | **N** | **(%)** | **N** | **(%)** | **p-value** |
|  | **Hours partially sun-exposed from May to August on workdays** | | | | | | **Hours partially sun-exposed from May to August on weekends** | | | | | | |
| 10-19 years | < 4 | 18 | (48.6) | 29 | (46.0) | 0.828 | < 4 | | 12 | (32.4) | 20 | (31.7) | 0.820 |
|  | ≥ 4 | 15 | (40.5) | 29 | (46.0) | ≥ 4 | | 20 | (54.1) | 38 | (60.3) |
| 20-39 years | < 4 | 17 | (45.9) | 40 | (63.5) | 0.172 | < 4 | | 13 | (35.1) | 24 | (38.1) | 1.000 |
|  | ≥ 4 | 15 | (40.5) | 18 | (28.6) | ≥ 4 | | 19 | (51.4) | 34 | (54.0) |
| 40-59 years | < 4 | 22 | (59.5) | 44 | (69.8) | 0.626 | < 4 | | 15 | (40.5) | 30 | (47.6) | 0.668 |
|  | ≥ 4 | 10 | (27.0) | 15 | (23.8) | ≥ 4 | | 18 | (48.6) | 29 | (46.0) |
| Last year | < 4 | 23 | (62.2) | 45 | (71.4) | 0.502 | < 4 | | 17 | (51.4) | 34 | (54.0) | 0.538 |
|  | ≥ 4 | 13 | (35.1) | 18 | (28.6) | ≥ 4 | | 19 | (52.8) | 29 | (46.0) |
| ≥ 60 years | < 4 | 15 | (40.5) | 27 | (42.9) | 0.804 | < 4 | | 10 | (27.0) | 21 | (33.3) | 0.799 |
|  | ≥ 4 | 11 | (29.7) | 17 | (27.0) | ≥ 4 | | 14 | (37.8) | 23 | (36.5) |
|  | **Days under high solar radiation in central European latitudes** | | | | | | | **Vacation days under high solar radiation in Southern regions** | | | | | |
| 10-19 years | < 15 | 15 | (40.5) | 34 | (54.0) | 0.380 | < 15 | | 26 | (70.3) | 51 | (81.0) | 0.337 |
|  | ≥ 15 | 16 | (43.2) | 24 | (38.1) | ≥ 15 | | 6 | (16.2) | 6 | (9.5) |
| 20-39 years | < 15 | 18 | (48.6) | 36 | (57.1) | 1.000 | < 15 | | 23 | (62.2) | 40 | (63.5) | 1.000 |
|  | ≥ 15 | 12 | (32.4) | 22 | (34.9) | ≥ 15 | | 9 | (24.3) | 16 | (25.4) |
| 40-59 years | < 15 | 18 | (48.6) | 40 | (63.5) | 0.501 | < 15 | | 25 | (67.6) | 46 | (73.0) | 1.000 |
|  | ≥ 15 | 13 | (35.1) | 21 | (33.3) | ≥ 15 | | 7 | (18.9) | 13 | (20.6) |
| Last year | < 15 | 23 | (62.1) | 43 | (68.3) | 0.509 | < 15 | | 28 | (75.7) | 53 | (84.1) | 0.409 |
|  | ≥ 15 | 13 | (35.1) | 18 | (28.6) | ≥ 15 | | 8 | (21.6) | 9 | (14.3) |
| ≥ 60 years | < 15 | 12 | (32.4) | 29 | (46.0) | 0.306 | < 15 | | 15 | (35.1) | 37 | (58.7) | 0.201 |
|  | ≥ 15 | 12 | (32.4) | 16 | (25.4) | ≥ 15 | | 7 | (18.9) | 7 | (11.1) |
|  | **Proportion of time under direct sun exposure when sunscreen with SPF was applied** | | | | | | **Proportion of time under direct sun exposure when head covering was used** | | | | | | |
| 10-19 years | < 50% | 25 | (67.6) | 43 | (68.3) | 0.790 | < 20% | | 27 | (73.0) | 49 | (77.8) | 0.718 |
|  | ≥ 50% | 6 | (16.2) | 13 | (20.6) | ≥ 20% | | 4 | (10.8) | 5 | (7.9) |
| 20-39 years | < 50% | 22 | (59.5) | 31 | (49.2) | 0.175 | < 20% | | 24 | (64.9) | 46 | (73.0) | 0.587 |
|  | ≥ 50% | 9 | (24.3) | 25 | (39.7) | ≥ 20% | | 7 | (18.9) | 10 | (15.9) |
| 40-59 years | < 50% | 19 | (51.4) | 21 | (33.3) | 0.044 | < 20% | | 15 | (40.5) | 40 | (63.5) | 0.101 |
|  | ≥ 50% | 12 | (32.4) | 35 | (55.6) | ≥ 20% | | 15 | (40.5) | 17 | (27.0) |
| Last year | < 50% | 16 | (43.2) | 21 | (33.3) | 0.275 | < 20% | | 20 | (54.1) | 40 | (63.5) | 0.398 |
|  | ≥ 50% | 18 | (48.6) | 40 | (63.5) | ≥ 20% | | 16 | (43.2) | 22 | (34.9) |
| ≥ 60 years | < 50% | 11 | (29.7) | 12 | (19.0) | 0.175 | < 20% | | 14 | (37.8) | 25 | (39.7) | 0.797 |
|  | ≥ 50% | 12 | (32.4) | 30 | (47.6) | ≥ 20% | | 9 | (24.3) | 20 | (31.7) |
|  | **Sunburns ≥ 2 days with skin scaling** | | | | | | **Sunburns with blistering** | | | | | | |
| 10-19 years | no | 8 | (21.6) | 17 | (27.0) | 0.632 | no | | 24 | (64.9) | 41 | (65.1) | 0.790 |
|  | yes | 24 | (64.9) | 39 | (61.9) | yes | | 6 | (16.2) | 14 | (22.2) |
| 20-39 years | no | 10 | (27.0) | 20 | (31.7) | 0.819 | no | | 25 | (67.6) | 43 | (68.3) | 1.000 |
|  | yes | 23 | (62.2) | 39 | (61.9) | yes | | 8 | (21.6) | 13 | (20.6) |
| 40-59 years | no | 20 | (54.1) | 32 | (50.8) | 0.664 | no | | 29 | (78.4) | 50 | (79.4) | 0.484 |
|  | yes | 13 | (35.1) | 26 | (41.3) | yes | | 2 | (5.4) | 7 | (11.1) |
| Last year | no | 30 | (81.1) | 50 | (79.4) | 1.000 | no | | 32 | (86.5) | 59 | (93.7) | 0.664 |
|  | yes | 6 | (16.2) | 10 | (15.9) | yes | | 3 | (8.1) | 3 | (4.8) |
| ≥ 60 years | no | 17 | (45.9) | 34 | (54.0) | 0.760 | no | | 21 | (56.8) | 39 | (61.9) | 0.350 |
|  | yes | 6 | (16.2) | 9 | (14.3) | yes | | 3 | (8.1) | 2 | (3.2) |

Supplementary Tab. 1: Gender-specific data on sun exposure, use of photoprotective measures, and history of sunburns with respect to different periods of life. Absolute numbers, percentages in brackets, p-value (Fisher’s exact).
